# Supplementary material for: Economic cascades, tipping points, and the costs of a business-as-usual approach to COVID-19
Source: Frontiers journal article supplement (doi:10.3389/fphy.2023.1074704), 2023-03-09
Supplement: Table_1.XLSX [file Table_1.XLSX]

## Sheet: Sheet2
SES	CA EDD Sector Name	NAICS Sector and Code	2020-05-17	18-49	50-64	65	total
Oakland-Berkeley-Livermore	Total farm	Crop Production 111; Animal Production and Aquaculture 112	22.9602	619.924	318.311	138.805	1100
	Mining and Logging	Logging 1133; Mining, Quarrying, and Oil and Gas Extraction 21	0	106.536	86.4012	7.06236	200
	Utilities	Utilities 22	2.56386	3275.08	1949.05	273.308	5500
	Construction	Construction 23	552.375	48983.4	20170.3	4793.89	74500
	Manufacturing	Manufacturing 31-33	368.653	59498.4	33404.1	6028.9	99300
	Wholesale trade	Wholesale Trade 42	130.274	27285.7	14656.8	3027.19	45100
	Retail trade	Retail Trade 44-45	3378.67	73454.7	26286	7980.64	111100
	Transportation and Warehousing	Transportation and Warehousing 48-49	149.81	22019.1	12232.9	2298.2	36700
	Information	Information 51	250.261	19276.4	7319	1054.35	27900
	Financial Activities	Finance and Insurance 52; Real Estate and Rental and Leasing 53	119.225	33245	17729.4	4006.31	55100
	Professional and Business Services	Professional, Scientific, and Technical Services 54; Management of Companies and Enterprises 55; Administrative and Support and Waste Management and Remediation Services 56	957.919	124100	52007.8	12834	189900
	Education and Health Services	Educational Services 61; Health Care and Social Assistance 62	1156.96	120143	62369	16030.8	199700
	Leisure and Hospitality	Arts, Entertainment, and Recreation 71; Accommodation and Food Services 72	9024.16	77189.1	22864.8	8321.86	117400
	Other Services	Other Services(except Public Administration) 81	557.845	25127.9	11873.5	3540.8	41100
	Government	Public Administration 92	2797.61	103147	59084.9	11870.3	176900
San Francisco-San Mateo-Redwood City	Total farm	Crop Production 111; Animal Production and Aquaculture 112	37.6254	751.254	497.91	213.211	1500
	Mining and Logging	Logging 1133; Mining, Quarrying, and Oil and Gas Extraction 21	0	60.6061	18.1818	21.2121	100
	Utilities	Utilities 22	3.84659	2957.2	1675.19	263.766	4900
	Construction	Construction 23	257.678	26949	11754.3	2839.06	41800
	Manufacturing	Manufacturing 31-33	163.76	25324.3	11242.9	1969.09	38700
	Wholesale trade	Wholesale Trade 42	107.819	16771.3	7232.61	1688.24	25800
	Retail trade	Retail Trade 44-45	1865.45	52554.6	17262.4	5317.62	77000
	Transportation and Warehousing	Transportation and Warehousing 48-49	91.203	28579.3	13557.2	2772.27	45000
	Information	Information 51	129.951	83768.7	13994.4	2006.91	99900
	Financial Activities	Finance and Insurance 52; Real Estate and Rental and Leasing 53	94.7986	59879.5	22002.1	4923.66	86900
	Professional and Business Services	Professional, Scientific, and Technical Services 54; Management of Companies and Enterprises 55; Administrative and Support and Waste Management and Remediation Services 56	697.642	220438	64529.9	13934.9	299600
	Education and Health Services	Educational Services 61; Health Care and Social Assistance 62	782.5	89368.8	47086.7	12961.9	150200
	Leisure and Hospitality	Arts, Entertainment, and Recreation 71; Accommodation and Food Services 72	4675.14	97354.2	34454.3	11416.3	147900
	Other Services	Other Services(except Public Administration) 81	421.644	25960	11423.3	3495.06	41300
	Government	Public Administration 92	613.435	75317.2	47903.2	8466.16	132300
San Jose-Sunnyvale-Santa Clara	Total farm	Crop Production 111; Animal Production and Aquaculture 112	133.178	2291.84	1592.23	682.747	4700
	Mining and Logging	Logging 1133; Mining, Quarrying, and Oil and Gas Extraction 21	0	123.784	67.027	9.18919	200
	Utilities	Utilities 22	5.94456	963.247	538.897	91.912	1600
	Construction	Construction 23	438.142	33228.7	14024.3	3508.87	51200
	Manufacturing	Manufacturing 31-33	326.292	105381	60091.9	9000.93	174800
	Wholesale trade	Wholesale Trade 42	67.3085	18707.8	10364.2	1860.73	31000
	Retail trade	Retail Trade 44-45	2906.06	56020.3	18468.4	5805.16	83200
	Transportation and Warehousing	Transportation and Warehousing 48-49	57.0545	9351.23	4522.67	969.049	14900
	Information	Information 51	236.718	83518.5	17960.9	1983.92	103700
	Financial Activities	Finance and Insurance 52; Real Estate and Rental and Leasing 53	145.309	24804.6	10571.3	2778.8	38300
	Professional and Business Services	Professional, Scientific, and Technical Services 54; Management of Companies and Enterprises 55; Administrative and Support and Waste Management and Remediation Services 56	871.091	167056	63056.7	12116	243100
	Education and Health Services	Educational Services 61; Health Care and Social Assistance 62	1162.35	107313	56239.8	14985.2	179700
	Leisure and Hospitality	Arts, Entertainment, and Recreation 71; Accommodation and Food Services 72	6982.84	65964.1	20753.2	7899.86	101600
	Other Services	Other Services(except Public Administration) 81	473.867	18538	8547.64	2340.49	29900
	Government	Public Administration 92	1122.92	61269.7	30561.9	5645.53	98600
Stockton-Lodi	Total farm	Crop Production 111; Animal Production and Aquaculture 112
	Mining and Logging	Logging 1133; Mining, Quarrying, and Oil and Gas Extraction 21	197.295	5862.77	3528.75	1711.18	11300
	Utilities	Utilities 22	0	64.3564	31.6832	3.9604	100
	Construction	Construction 23	4.24729	929.802	485.96	79.9906	1500
	Manufacturing	Manufacturing 31-33	126.843	8325.05	3293.03	855.079	12600
	Wholesale trade	Wholesale Trade 42	89.5954	11027.4	6136.39	1346.62	18600
	Retail trade	Retail Trade 44-45	43.4483	8167.33	3626.99	762.234	12600
	Transportation and Warehousing	Transportation and Warehousing 48-49	714.751	17111.8	5795.05	1778.43	25400
	Information	Information 51	306.252	21911.8	7454.59	1627.36	31300
	Financial Activities	Finance and Insurance 52; Real Estate and Rental and Leasing 53	35.2542	1031.41	447.458	85.8757	1600
	Professional and Business Services	Professional, Scientific, and Technical Services 54; Management of Companies and Enterprises 55; Administrative and Support and Waste Management and Remediation Services 56	51.3802	4955.45	2361.3	631.867	8000
	Education and Health Services	Educational Services 61; Health Care and Social Assistance 62	233.154	13179.5	5185.17	1602.14	20200
	Leisure and Hospitality	Arts, Entertainment, and Recreation 71; Accommodation and Food Services 72	151.213	24202.8	11542.7	2903.29	38800
	Other Services	Other Services(except Public Administration) 81	2288.82	15492.3	3466.46	1252.44	22500
	Government	Public Administration 92	164.403	5001.93	2036.23	597.438	7800
			217.385	28839.1	14669.9	2273.63	46000
Fresno	Total farm	Crop Production 111; Animal Production and Aquaculture 112	551.289	19343.1	11389.9	5315.64	36600
	Mining and Logging	Logging 1133; Mining, Quarrying, and Oil and Gas Extraction 21	0	191.899	93.0168	15.0838	300
	Utilities	Utilities 22	5.60976	1441.01	721.555	131.829	2300
	Construction	Construction 23	165.459	12279.3	4565.01	1290.21	18300
	Manufacturing	Manufacturing 31-33	120.94	16101.3	8113.54	1764.19	26100
	Wholesale trade	Wholesale Trade 42	60.1092	9645.64	4063.94	1030.31	14800
	Retail trade	Retail Trade 44-45	792.561	28379.5	7252.42	2375.53	38800
	Transportation and Warehousing	Transportation and Warehousing 48-49	76.1889	9661.88	3732.32	829.613	14300
	Information	Information 51	34.1848	2411.88	780.245	173.696	3400
	Financial Activities	Finance and Insurance 52; Real Estate and Rental and Leasing 53	61.2136	9512.7	4058.66	1267.42	14900
	Professional and Business Services	Professional, Scientific, and Technical Services 54; Management of Companies and Enterprises 55; Administrative and Support and Waste Management and Remediation Services 56	241.127	22944.7	7713.75	2600.47	33500
	Education and Health Services	Educational Services 61; Health Care and Social Assistance 62	220.651	48628.7	20238	5112.65	74200
	Leisure and Hospitality	Arts, Entertainment, and Recreation 71; Accommodation and Food Services 72	2030.92	26015.1	4972.25	1881.77	34900
	Other Services	Other Services(except Public Administration) 81	130.039	7944.86	2994.02	931.079	12000
	Government	Public Administration 92	128.462	49990	22976.3	3505.17	76600
Oxnard-Thousand Oaks-Ventura	Total farm	Crop Production 111; Animal Production and Aquaculture 112	492.796	13992.9	5992.32	3222.03	23700
	Mining and Logging	Logging 1133; Mining, Quarrying, and Oil and Gas Extraction 21	0	546.214	296.659	57.1269	900
	Utilities	Utilities 22	9.60171	520.733	301.814	67.8521	900
	Construction	Construction 23	181.924	10812.4	4903.29	1302.34	17200
	Manufacturing	Manufacturing 31-33	82.7211	15289.5	9021.59	2006.24	26400
	Wholesale trade	Wholesale Trade 42	38.2155	8299.8	4022.68	939.297	13300
	Retail trade	Retail Trade 44-45	851.372	25426.5	8334.57	2587.53	37200
	Transportation and Warehousing	Transportation and Warehousing 48-49	33.1777	3327.4	1717.75	421.677	5500
	Information	Information 51	109.642	3059.54	1225.91	304.91	4700
	Financial Activities	Finance and Insurance 52; Real Estate and Rental and Leasing 53	74.5847	9743.14	4924.14	1158.13	15900
	Professional and Business Services	Professional, Scientific, and Technical Services 54; Management of Companies and Enterprises 55; Administrative and Support and Waste Management and Remediation Services 56	280.685	29367.6	12224.8	3226.87	45100
	Education and Health Services	Educational Services 61; Health Care and Social Assistance 62	256.744	30484.7	15556.3	4102.28	50400
	Leisure and Hospitality	Arts, Entertainment, and Recreation 71; Accommodation and Food Services 72	3081.95	25719.9	6538.17	2559.94	37900
	Other Services	Other Services(except Public Administration) 81	174.173	5829.67	2662.68	933.476	9600
	Government	Public Administration 92	449.983	29187.3	16154.8	2907.91	48700
Los Angeles-Long Beach-Glendale	Total farm	Crop Production 111; Animal Production and Aquaculture 112	97.1856	2495.48	1288.49	518.846	4400
	Mining and Logging	Logging 1133; Mining, Quarrying, and Oil and Gas Extraction 21	0	1273.06	529.162	97.78	1900
	Utilities	Utilities 22	27.4502	7148.56	4384.97	639.025	12200
	Construction	Construction 23	1024.42	97678.6	43223.4	10673.6	152600
	Manufacturing	Manufacturing 31-33	1265.57	187817	118274	29244.1	336600
	Wholesale trade	Wholesale Trade 42	736.392	135911	66228.4	15824	218700
	Retail trade	Retail Trade 44-45	7004.7	293410	90126.9	25258.8	415800
	Transportation and Warehousing	Transportation and Warehousing 48-49	749.619	129837	62678.3	12534.6	205800
	Information	Information 51	686.353	155246	61992.9	23074.8	241000
	Financial Activities	Finance and Insurance 52; Real Estate and Rental and Leasing 53	403.464	144141	64332.9	16123.1	225000
	Professional and Business Services	Professional, Scientific, and Technical Services 54; Management of Companies and Enterprises 55; Administrative and Support and Waste Management and Remediation Services 56	3303.37	439653	160162	44581.4	647700
	Education and Health Services	Educational Services 61; Health Care and Social Assistance 62	2338.9	537160	258556	67045.9	865100
	Leisure and Hospitality	Arts, Entertainment, and Recreation 71; Accommodation and Food Services 72	20503.7	380411	105770	37016	543700
	Other Services	Other Services(except Public Administration) 81	1303.34	97542.5	47291.6	13962.6	160100
	Government	Public Administration 92	3170.3	363713	202135	37181.9	606200
Anaheim-Santa Ana-Irvine	Total farm	Crop Production 111; Animal Production and Aquaculture 112	39.9388	869.702	603.902	286.458	1800
	Mining and Logging	Logging 1133; Mining, Quarrying, and Oil and Gas Extraction 21	0	249.3	126.05	24.6499	400
	Utilities	Utilities 22	4.51656	1841.75	993.142	160.589	3000
	Construction	Construction 23	616.946	68773.3	29166.4	6843.35	105400
	Manufacturing	Manufacturing 31-33	472.189	88162.7	58135.7	11929.5	158700
	Wholesale trade	Wholesale Trade 42	172.723	48139	24844.8	5143.5	78300
	Retail trade	Retail Trade 44-45	2949.36	103735	33949.4	9666.01	150300
	Transportation and Warehousing	Transportation and Warehousing 48-49	174.021	16674.2	8227.62	1624.19	26700
	Information	Information 51	166.063	18933.3	5723.15	977.449	25800
	Financial Activities	Finance and Insurance 52; Real Estate and Rental and Leasing 53	198.401	78462	34385.9	7753.63	120800
	Professional and Business Services	Professional, Scientific, and Technical Services 54; Management of Companies and Enterprises 55; Administrative and Support and Waste Management and Remediation Services 56	2805.91	214840	84666.1	23987.9	326300
	Education and Health Services	Educational Services 61; Health Care and Social Assistance 62	1018.1	147673	69174.1	17234.8	235100
	Leisure and Hospitality	Arts, Entertainment, and Recreation 71; Accommodation and Food Services 72	11738.1	157051	42850.5	15860.9	227500
	Other Services	Other Services(except Public Administration) 81	623.672	32222.9	13881.6	4071.85	50800
	Government	Public Administration 92	1154.27	106327	51933.6	9284.69	168700
Riverside-San Bernardino-Ontario	Total farm	Crop Production 111; Animal Production and Aquaculture 112	248.844	7495.96	4354.76	1700.43	13800
	Mining and Logging	Logging 1133; Mining, Quarrying, and Oil and Gas Extraction 21	6.76329	731.884	406.28	55.0725	1200
	Utilities	Utilities 22	6.46175	2989.37	1569.4	234.777	4800
	Construction	Construction 23	985.619	70788.1	27507.9	7118.36	106400
	Manufacturing	Manufacturing 31-33	542.868	58546	32753.8	6957.33	98800
	Wholesale trade	Wholesale Trade 42	213.345	43217.7	19206.3	3962.67	66600
	Retail trade	Retail Trade 44-45	3508.55	128307	37757.3	10426.8	180000
	Transportation and Warehousing	Transportation and Warehousing 48-49	1095.5	102504	32276	6324.54	142200
	Information	Information 51	189.232	7860.25	2704.19	546.331	11300
	Financial Activities	Finance and Insurance 52; Real Estate and Rental and Leasing 53	168.437	28403.5	11937.6	3090.49	43600
	Professional and Business Services	Professional, Scientific, and Technical Services 54; Management of Companies and Enterprises 55; Administrative and Support and Waste Management and Remediation Services 56	1550	104377	38776.1	10997.1	155700
	Education and Health Services	Educational Services 61; Health Care and Social Assistance 62	672.508	163615	75893.7	17518.9	257700
	Leisure and Hospitality	Arts, Entertainment, and Recreation 71; Accommodation and Food Services 72	10983	122458	30996.7	10562	175000
	Other Services	Other Services(except Public Administration) 81	542.467	28628.1	12265.5	3363.94	44800
	Government	Public Administration 92	549.399	171240	78273.5	10936.6	261000
San Diego-Carlsbad	Total farm	Crop Production 111; Animal Production and Aquaculture 112	149.949	5534.51	2760.47	1055.07	9500
	Mining and Logging	Logging 1133; Mining, Quarrying, and Oil and Gas Extraction 21	2.25443	243.961	135.427	18.3575	400
	Utilities	Utilities 22	6.19251	2864.81	1504	224.994	4600
	Construction	Construction 23	774.415	55619.2	21613.4	5592.99	83600
	Manufacturing	Manufacturing 31-33	640.123	69034.4	38621.7	8203.74	116500
	Wholesale trade	Wholesale Trade 42	139.988	28357.5	12602.3	2600.13	43700
	Retail trade	Retail Trade 44-45	2812.69	102860	30268.8	8358.81	144300
	Transportation and Warehousing	Transportation and Warehousing 48-49	230.348	21553.2	6786.58	1329.84	29900
	Information	Information 51	391.861	16277	5599.82	1131.34	23400
	Financial Activities	Finance and Insurance 52; Real Estate and Rental and Leasing 53	297.082	50096.9	21055.1	5450.89	76900
	Professional and Business Services	Professional, Scientific, and Technical Services 54; Management of Companies and Enterprises 55; Administrative and Support and Waste Management and Remediation Services 56	2632.11	177246	65847.2	18674.5	264400
	Education and Health Services	Educational Services 61; Health Care and Social Assistance 62	579.605	141012	65409.4	15098.8	222100
	Leisure and Hospitality	Arts, Entertainment, and Recreation 71; Accommodation and Food Services 72	12401.4	138273	34999.7	11926.1	197600
	Other Services	Other Services(except Public Administration) 81	669.608	35337.8	15140.2	4152.37	55300
	Government	Public Administration 92	530.033	165204	75514.5	10551.1	251800

## Sheet: Sheet1
	Feb 2020 Employed	2020-05-17	18-49	50-64	65	2020-05-17	18-49	50-64	65
Total farm	1100	0.0208729	0.563567	0.289374	0.126186	#NAME?	#NAME?	#NAME?	#NAME?
Mining and logging	200	0	0.532682	0.432006	0.0353118	#NAME?	#NAME?	#NAME?	#NAME?
Utilities	5500	0.000466157	0.595469	0.354373	0.0496923	#NAME?	#NAME?	#NAME?	#NAME?
Construction	74500	0.00741443	0.657496	0.270742	0.0643475	#NAME?	#NAME?	#NAME?	#NAME?
Manufacturing	99300	0.00371251	0.599178	0.336396	0.060714	#NAME?	#NAME?	#NAME?	#NAME?
Wholesale trade	45100	0.00288857	0.605005	0.324985	0.0671217	#NAME?	#NAME?	#NAME?	#NAME?
Retail trade	111100	0.0304111	0.661158	0.236598	0.071833	#NAME?	#NAME?	#NAME?	#NAME?
Transportation and warehousing	36700	0.004082	0.599975	0.333322	0.0626211	#NAME?	#NAME?	#NAME?	#NAME?
Information	27900	0.00896992	0.69091	0.26233	0.0377902	#NAME?	#NAME?	#NAME?	#NAME?
Financial	55100	0.00216379	0.603358	0.321768	0.0727099	#NAME?	#NAME?	#NAME?	#NAME?
Professional and business	189900	0.00504433	0.653503	0.273869	0.0675831	#NAME?	#NAME?	#NAME?	#NAME?
Education and health	199700	0.00579351	0.601619	0.312313	0.0802742	#NAME?	#NAME?	#NAME?	#NAME?
Leisure and hospitality	117400	0.0768668	0.657488	0.19476	0.0708847	#NAME?	#NAME?	#NAME?	#NAME?
Other	41100	0.0135729	0.611384	0.288892	0.0861507	#NAME?	#NAME?	#NAME?	#NAME?
Government	176900	0.0158146	0.583082	0.334001	0.0671017	#NAME?	#NAME?	#NAME?	#NAME?
