# Supplementary material for: Economic cascades, tipping points, and the costs of a business-as-usual approach to COVID-19
Source: Frontiers journal article supplement (doi:10.3389/fphy.2023.1074704), 2023-03-09
Supplement: Table_2.XLSX [file Table_2.XLSX]

## Sheet: Sheet1
CA EDD Sector Name	NAICS Sector and Code	Total farm	Mining and Logging	Utilities	Construction	Manufacturing	Wholesale trade	Retail trade	Transportation and Warehousing	Information	Financial Activities	Professional and Business Services	Education and Health Services	Leisure and Hospitality	Other Services	Government
Total farm	Crop Production 111; Animal Production and Aquaculture 112	1.28153	0.0135159	0.00773	0.0235804	0.0878533	0.005737	0.0077769	0.0112318	0.0078531	0.0037091	0.0066393	0.0085443	0.0156276	0.0094602	0.0146184
Mining and Logging	Logging 1133; Mining, Quarrying, and Oil and Gas Extraction 21	0.0372335	1.11834	0.093211	0.0421188	0.117155	0.008586	0.0091695	0.016603	0.011365	0.006575	0.0081114	0.0122726	0.0151296	0.0138087	0.0268551
Utilities	Utilities 22	0.0184729	0.0166119	1.04222	0.0093255	0.0176214	0.0109654	0.0210174	0.0146287	0.0066778	0.0178644	0.0067692	0.0094967	0.021795	0.008112	0.0099787
Construction	Construction 23	0.0120597	0.012506	0.0193105	1.00458	0.0087992	0.0060754	0.0087446	0.0109469	0.0052574	0.0299727	0.0044561	0.0056354	0.0076677	0.0087455	0.0287984
Manufacturing	Manufacturing 31-33	0.387082	0.236255	0.134891	0.39547	1.60435	0.0965353	0.0934846	0.193561	0.132803	0.0599546	0.091004	0.146159	0.1598	0.159384	0.223719
Wholesale trade	Wholesale Trade 42	0.150443	0.0526213	0.03145	0.0837541	0.122541	1.04333	0.0302428	0.0430683	0.0310981	0.0148695	0.0205728	0.0367008	0.0374893	0.0335185	0.0431247
Retail trade	Retail Trade 44-45	0.0083378	0.0036551	0.0075759	0.0558599	0.0070963	0.0025437	1.00604	0.0141941	0.0021397	0.0044783	0.0025468	0.0022317	0.0077494	0.012921	0.0033437
Transportation and Warehousing	Transportation and Warehousing 48-49	0.0681456	0.0521195	0.0750681	0.0452964	0.0749744	0.0579532	0.0596256	1.14129	0.0282405	0.0166029	0.0268328	0.0240655	0.0267532	0.0229341	0.0362094
Information	Information 51	0.0195425	0.0257214	0.0222736	0.023455	0.0269453	0.0397817	0.0407261	0.0333193	1.16966	0.0303883	0.054742	0.0375448	0.0384731	0.0409086	0.0452146
Financial Activities	Finance and Insurance 52; Real Estate and Rental and Leasing 53	0.186783	0.136408	0.0748774	0.0900924	0.0908193	0.155211	0.199256	0.168378	0.104551	1.27616	0.131413	0.171133	0.165861	0.157982	0.0864993
Professional and Business Services	Professional, Scientific, and Technical Services 54; Management of Companies and Enterprises 55; Administrative and Support and Waste Management and Remediation Services 56	0.0992767	0.169228	0.114341	0.124642	0.153994	0.217426	0.190228	0.145928	0.208379	0.145422	1.22646	0.167823	0.194094	0.129072	0.126296
Education and Health Services	Educational Services 61; Health Care and Social Assistance 62	0.0005429	0.0003333	0.0007803	0.0005369	0.0005199	0.0016038	0.0041511	0.0009116	0.000553	0.000342	0.0006299	1.01355	0.0017449	0.0048802	0.0079003
Leisure and Hospitality	Arts, Entertainment, and Recreation 71; Accommodation and Food Services 72	0.0088715	0.0086924	0.0105185	0.0068565	0.0096989	0.0132698	0.0135353	0.0239171	0.0361763	0.0183678	0.0258035	0.027935	1.03519	0.0162784	0.0114603
Other Services	Other Services(except Public Administration) 81	0.0092786	0.0070565	0.0051895	0.0103339	0.0111031	0.0195997	0.0155597	0.0195836	0.0093345	0.009698	0.0116059	0.0137683	0.0163076	1.01573	0.0135882
Government	Public Administration 92	0.0222345	0.0177391	0.0336137	0.013968	0.0239451	0.0235787	0.0233634	0.0482382	0.0186651	0.0222746	0.013538	0.0165336	0.0221791	0.0199394	1.01692
